# Supplementary material for: Cocrystals of spironolactone and griseofulvin based on an in silico screening method
Source: Royal Society of Chemistry journal article supplement (doi:10.1039/c7ce00891k), 2017-01-01
Supplement: c7ce00891k1.pdf [file c7ce00891k1.pdf]

## Cocrystals of Spironolactone and Griseofulvin Based on an *in Silico* Screening Method

Tudor Grecu,<sup>a</sup> Rafel Prohens,<sup>b,c</sup> James F. McCabe,<sup>a</sup> Elliot J. Carrington,<sup>d</sup> James S. Wright,<sup>d</sup> Lee Brammer,<sup>d</sup> and Christopher A. Hunter\*<sup>e</sup>

<sup>a</sup> AstraZeneca, Silk Road Business Park, Macclesfield, Cheshire SK10 2NA, UK.

<sup>b</sup> Unitat de Polimorfisme i Calorimetria, Centres Científics i Tecnològics, Universitat de Barcelona, Baldiri Reixac 10, 08028 Barcelona, Spain.

<sup>c</sup> CIRCE Crystal Engineering, Isaac Newton, s/n. ParcBit, 07121 Palma de Mallorca, Spain.

<sup>d</sup> Department of Chemistry, University of Sheffield, Sheffield S3 7HF, UK.

<sup>e</sup> Department of Chemistry, University of Cambridge, Lensfield Road, Cambridge CB2 1EW, UK.

Email: herchelsmith.orgchem@ch.cam.ac.uk.

### List of all 310 CCFs virtually screened:

resorcinol, sulfamic acid, 3,4-dihydroxybenzoic acid, etidronic acid, allocitric acid, propyl gallate, t-butyl hydroquinone, isocitric acid, fumaric acid, tartaric acid, citric acid, 4-hydroxybenzoic acid, 3-hydroxybenzoic acid, malic acid, erythroic acid, D-glucuronic acid, 2,4-dihydroxybenzoic acid, gentisic acid, octyl gallate, 4-vinylphenol, sucralose, 3,3'-thiodipropionic acid, succinic acid, ascorbic acid, L-tyrosine, 2,3-dihydroxybenzoic acid, maltose, thymol, 2-phenyl phenol, sucrose, adipic acid, L-glutamic acid, hydroquinone monoethyl ether, o-cresol, L-rhamnose, aconitic acid, inositol, 4-(1,1-dimethylethyl) phenol, 2,5-xyleneol, indole, p-cresol, folic acid, glucono delta-lactone, taurocholic acid, 3,4-xyleneol, salicylic acid, skatole, 4-hydroxymethyl-2,6-di-t-butyl phenol, 4-aminobenzoic acid, 2-t-butyl-4-hydroxyanisole, oxalic acid, 3-aminobenzoic acid, taurine, 4-ethyl phenol, urea, phenol, D-isoascorbic acid,  $\alpha$ -D-glucopyranose, 2,6-di-t-butyl-4-methylphenol, 4-hydroxybenzyl alcohol, pyridoxine, ethyl-4-hydroxybenzoate, cholic acid, 2,6-xyleneol, L-arabinose, heptyl 4-hydroxybenzoate, D-ribose, methionine, propyl 4-hydroxybenzoate, lactose, 10-undecenoic acid, saccharin, glycocholic acid, butyl 4-hydroxybenzoate, aspartic acid, methyl 4-hydroxybenzoate, 2,5-dihydroxy-1,4-dithiane, mannitol, phenethyl salicylate, 3-hydroxy-4-methoxyphenylacetic acid, L-asparagine, phenylalanine, citronellol, neotame, phenyl salicylate, cyclohexanecarboxylic acid, vanillin,  $\alpha$ -ketobutyric acid, stearic acid, palmitic acid, lauric acid, undecanoic acid, myristic acid, 3-methyl-2-oxobutanoic acid, 2,5-dimethyl-2,5-dihydroxy-1,4-dithiane, phenylacetic acid, 3-phenyl-2-propenyl- $\beta$ -D-glucopyranoside, hydrocinnamic acid, 3-phenylpropionic acid, 4-(4-hydroxyphenyl)-2-butanone, vanillyl alcohol, L-tryptophan, (E)-N-(4-hydroxy-3-methoxybenzyl)-8-methylnon-6-enamide, myristyl alcohol, L-iso-leucine, xylitol, levulinic acid, 3-hydroxy-2-oxopropionic acid, 2-methoxy-4-vinylphenol, aspartame, 2-methyl-4-phenyl-2-butanol, biotin, isoborneol, 2-Hydroxy-4-methylbenzaldehyde, cyclohexanecarboxylic acid, L-glutamine, 2,6-dimethoxyphenol, benzoic acid, fenchyl alcohol, cysteine,  $\alpha,\alpha$ -dimethylphenethyl alcohol, nicotinic acid, 2-hydroxypiperitone, menthol, borneol, 5-oxodecanoic acid, 5-oxododecanoic acid, 4-isopropylbenzyl alcohol, 5-oxooctanoic acid, azodicarbonamide, methyl phenylacetate, 2-hydroxy-5-methylacetophenone, 3-methylcrotonic acid, 2-methoxybenzoic acid, 3-ethoxy-4-hydroxybenzaldehyde,  $\alpha$ -terpineol, 4-methoxybenzoic acid, retinol, 2-methyl-2-pentenoic acid, L-histidine, glycolic acid, trans-2-methyl-2-butenic acid, propenyl guaethol, L-leucine, trans-2-hexenoic acid, stearyl alcohol, carnitine, benzoin, 1,5,5,9-tetramethyl-13-oxatricyclo[8.3.0.0]tridecane, nicotinamide, 2-hydroxy-4-methoxybenzaldehyde, L-hydroxyproline, guaiacol, cinnamic acid, sorbic acid, L-serine, D-sorbitol, 4-thujanol, levulose, 2,5-dihydroxyacetophenone, triothioacetone, phenoxyacetic acid, ethyl

octadecanoate, N-ethyl-2,2-diisopropylbutanamide, ethylpalmitate, N-(2-(3,4-dimethoxyphenyl)ethyl)-3,4-dimethoxycinnamic-acidamide, lactic acid, sorbose, nootkatone, eugenyl isovalerate, phenethyl anthranilate, L-proline, L-threonine, retinyl acetate, eugenyl benzoate, 1,2,5,6-tetrahydrocuminic acid, guaiacyl phenylacetate, 2,3,5,6-tetramethylpyrazine, 4-hydroxy-3,5-dimethoxybenzaldehyde, camphor, phenethyl octanoate, 2-methoxybenzoic acid, allyl anthranilate, 4-aminobenzaldehyde, paradol, xylose, isoeugenyl acetate, phenethyl phenylacetate, 4-hydroxy-2,5-dimethyl-3-furanone, glycerine, zingerone, furaneol, isoeugenyl benzyl ether, 4-tolyl phenylacetate, tyramine, 4-dimethoxybenzene, isoeugenyl ethyl ether,  $\beta$ -naphthyl ethyl ether, DL-alanine, L-arginine,  $\beta$ -naphthyl isobutyl ether, cubebol, 2,6-dimethoxyphenol, methyl anthranilate, ocimene, trans-anethole, threobromine, 4-hydroxy-5-methyl-3-furanone, isoeugenyl methyl ether, sclareolide, 4-tolyl acetate, 5-ethyl-3-hydroxy-4-methyl-2-furanone, 2,6-dimethylpyrazine,  $\omega$ -pentadecalactone, methyl phenylacetate,  $\beta$ -naphthyl methyl ether, piperitone, 5-methylquinoxaline, 4,5-dimethyl-3-hydroxy-2,5-dihydrofuran-2-one, methyl-2-pyrrolyl-ketone, 2-propionyl pyrrole, isobutyl N-methylantranilate, phenethyl cinnamate, cinnamyl cinnamate, L-methyl lactate, benzylcinnamate, DL-valine, 4-methyl biphenyl, diphenyl ether, benzophenone, riboflavin, Llysine, 1,3-diphenyl-2-propanone, biphenyl, methyl cinnamate, 2,6,6-trimethylcyclohex-2-ene-1,4-dione, 1,3-diphenyl-2-propanone, acetamide, diphenyl ether, benzyl disulfide, piperine, butyramide, 3,4-dimethoxybenzaldehyde, camphene, 4-methylacetophenone, 2-tridecanone, cis-2-hexenal, maltol propionate, benzoyl peroxide, glyceryl tribenzoate, maltol, caffeine, 4-phenyl-3-buten-2-one, 3,5-dimethyl-1,2-cyclopentadione, guaiacyl acetate, isoquinoline, caprolactam, 1,4-dithiane, methylcyclopentenolone, 2-thienyl disulfide, 2-naphthalenethiol, ethyl maltol, 3,4-dimethyl-1,2-cyclopentadione, methyl- $\beta$ -naphthyl-ketone, benzyl cinnamate, 2-acetyl-2-thiazoline, 3,5-dimethyl-1,2-cyclopentadione, 2-oxo-3-phenylpropionic acid, 4-methoxyacetophenone, methyl anisate, octadecylamine, acetanisole, pyrazine, 2-mercaptoanisole, methyl nicotinate, 4,5-dimethylthiazole, acetylpyrazine, dihydroxyacetone, N-(1,1-Dimethyl-2-hydroxyethyl)-2,2-diethylbutanamide, 4-(2-furyl)-3-buten-2-one, 2-methyl-1,4-naphthoquinone, 3,4-dimethyl-1,2-cyclopentadione, vanillin acetate, 4-methylcinnamaldehyde, 2-methylcinnamaldehyde, piperazine, methyl isothiocyanate, 4-methoxycinnamaldehyde, 6-methylcoumarin, 2-methoxybenzaldehyde, maltitol, 2-furyl methyl ketone, phthalide, 2-decylfuran, glucose pentaacetate, piperonal, succinamide,  $\alpha$ -ketoglutaric acid, 4-coumaric acid,  $\gamma$ -tocopherol, lactitol, ethyl gallate, 2-butenic acid, divanillin, furfuryl 2-methyl-3-furyl disulfide,  $\gamma$ -glutamylvalyl-glycine, L-alanyl-L-glutamine, 4-Allyl-2-(5-allyl-2-hydroxyphenyl)phenol.

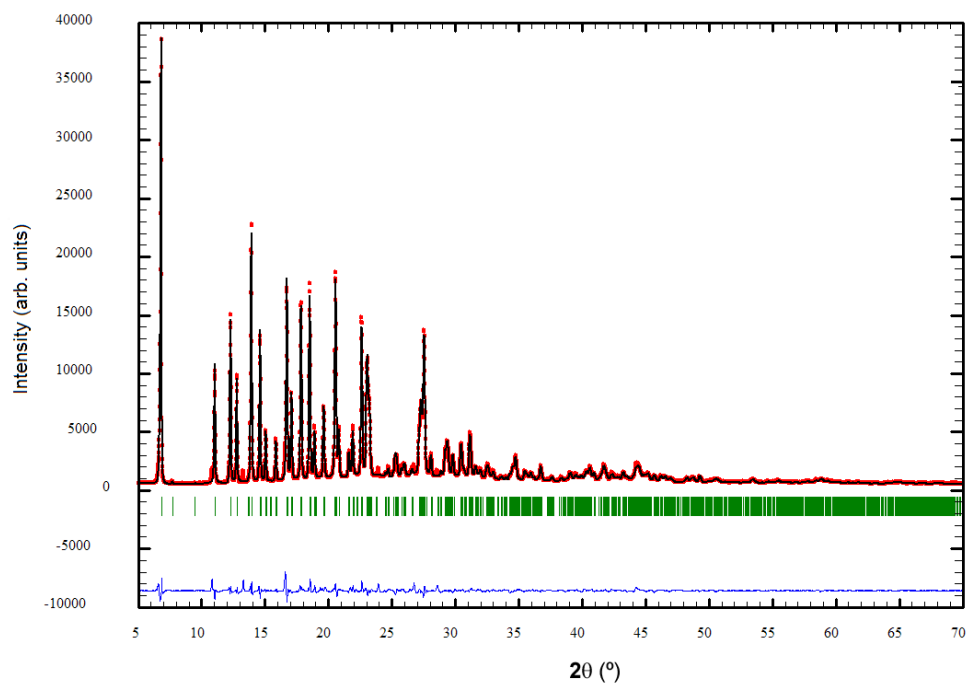

**Figure S1.** Results of the final Rietveld refinement of the griseofulvin-4-tert-butyl phenol cocrystal using  $\text{CuK}\alpha$  radiation ( $\lambda = 1.5418 \text{ \AA}$ ). The plot shows the experimental powder XRD profile (red+marks), the calculated powder XRD profile (black solid line), and the difference profile (blue, lower line). Tick marks indicate peak positions.

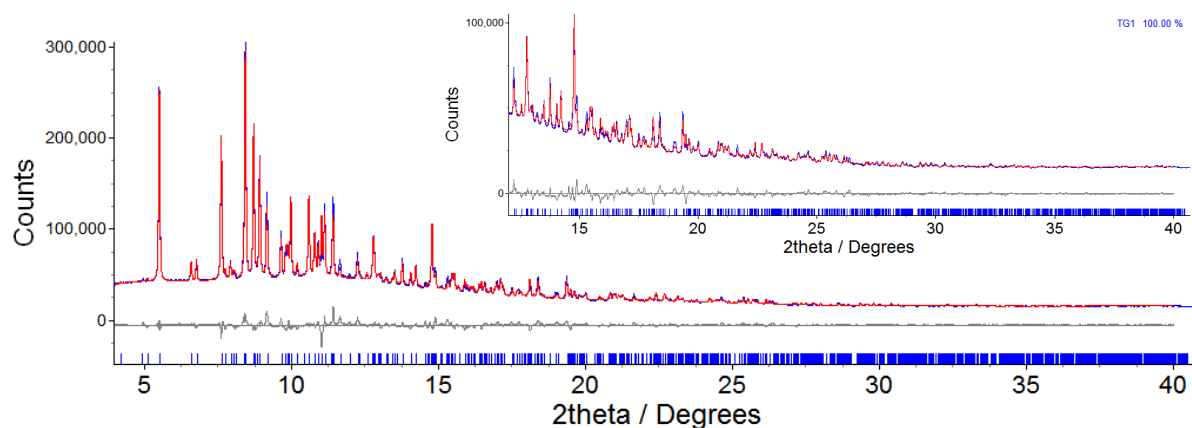

**Figure S2.** Results of the final Rietveld refinement of the spironolactone-phenol cocrystal using synchrotron X-ray radiation ( $\lambda = 0.82665 \text{ \AA}$ ): observed (blue) and calculated (red) profiles and difference plot [ $I_{\text{obs}} - I_{\text{calc}}$ ] (grey) of the Rietveld refinement ( $2\theta$  range  $4.0 - 40^\circ$ ). The blue tick marks below the patterns give the positions of the Bragg reflections.

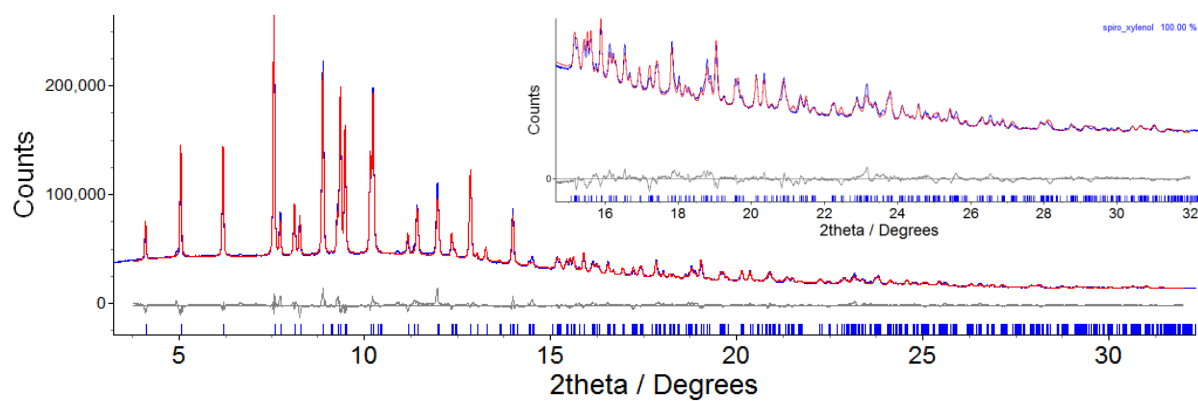

**Figure S3.** Results of the final Rietveld refinement of the spironolactone-phenol cocrystal using synchrotron X-ray radiation ( $\lambda = 0.82665 \text{ \AA}$ ): observed (blue) and calculated (red) profiles and difference plot [ $I_{obs} - I_{calc}$ ] (grey) of the Rietveld refinement ( $2\theta$  range  $4.0 - 32^\circ$ ). The blue tick marks below the patterns give the positions of the Bragg reflections.

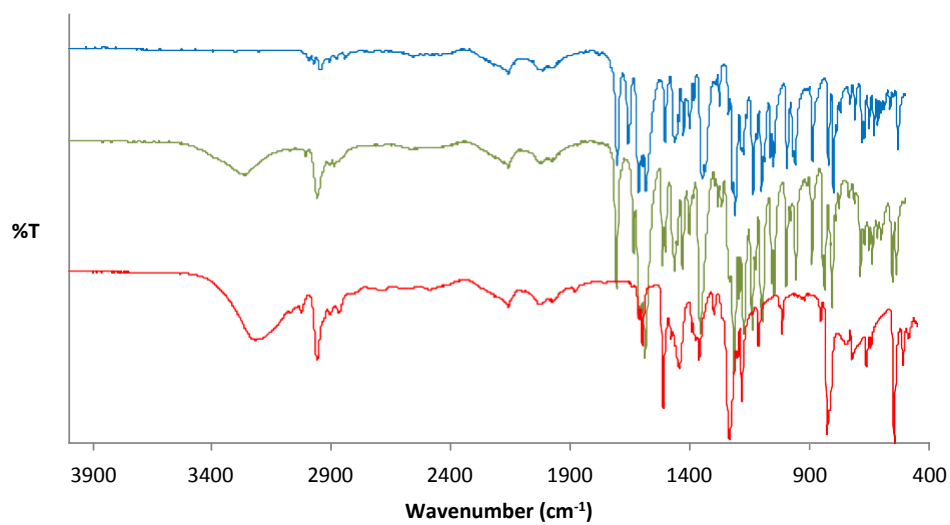

**Figure S4.** IR spectra of griseofulvin (blue), 4-*tert*-butyl phenol (red) and the cocrystal (green) (arbitrary vertical scale).

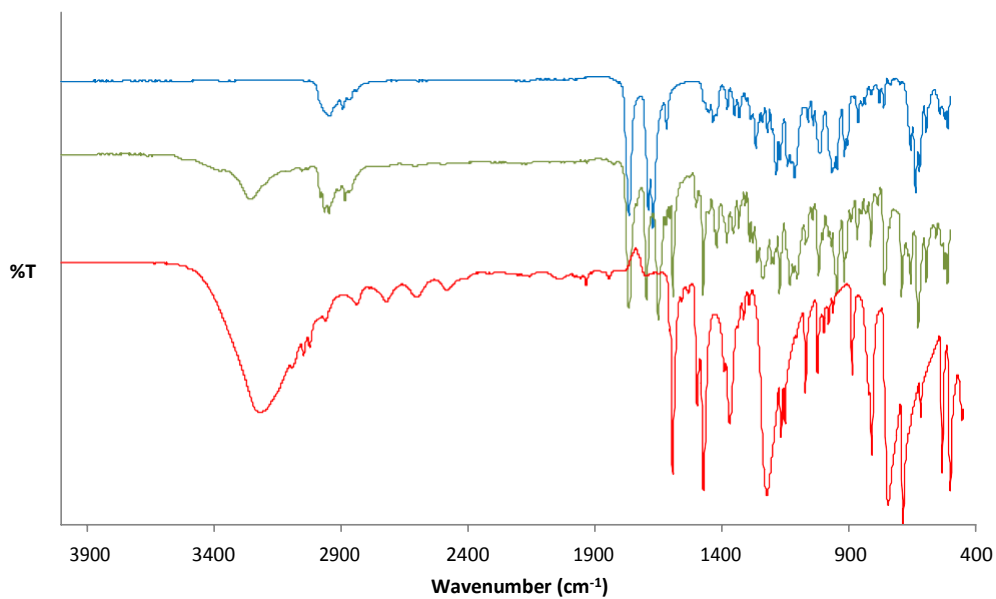

**Figure S5.** IR spectra of spironolactone (blue), phenol (red) and the cocrystal (green) (arbitrary vertical scale).

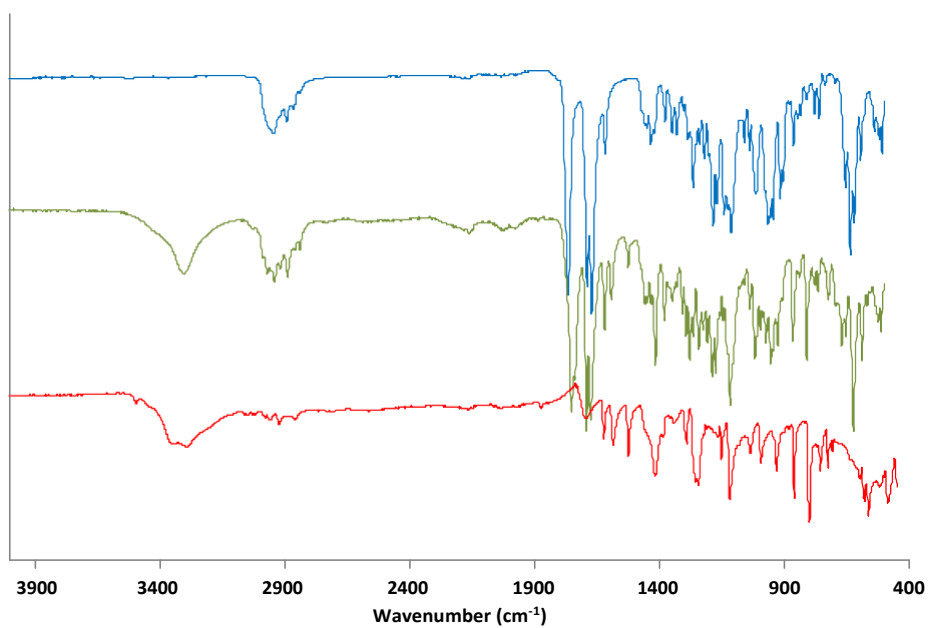

**Figure S6.** IR spectra of spironolactone (blue), 2,5-xyleneol (red) and the cocrystal (green) (arbitrary vertical scale).
